# Supplementary material for: Recovering and Exploiting Aragonite and Calcite Single Crystals with Biologically Controlled Shapes from Mussel Shells
Source: PubMed Central journal article supplement — ACS Omega. 2022 Nov 17;7(48):43992–9. doi: 10.1021/acsomega.2c05386 (PMC9730488; doi:10.1021/acsomega.2c05386), 2022-11-17
Supplement: ao2c05386_si_001.pdf [file ao2c05386_si_001.pdf]

# Supporting Information

## Recovering and exploiting aragonite and calcite single crystals with biologically controlled shapes from mussel shells

*Carla Triunfo,<sup>1,2</sup> Stefanie Gärtner,<sup>3</sup> Chiara Marchini,<sup>1,2</sup> Simona Fermani,<sup>1,4</sup> Gabriele Maoloni,<sup>5</sup> Stefano Goffredo,<sup>2,6</sup> Jaime Gomez Morales,<sup>7</sup> Helmut Cölfen,<sup>3</sup> Giuseppe Falini<sup>\*,1</sup>*

<sup>1</sup> Department of Chemistry “Giacomo Ciamician”, University of Bologna, via F. Selmi 2, 40126 Bologna, Italy. <sup>2</sup> Fano Marine Center, The Inter-Institute Center for Research on Marine Biodiversity, Resources and Biotechnologies, viale Adriatico 1/N 61032 Fano, Italy. <sup>3</sup> Department of Chemistry, Physical Chemistry, University of Konstanz, Universitätsstrasse 10, Box 714, D-78457 Konstanz, Germany. <sup>4</sup> Interdepartmental Centre for Industrial Research Health Sciences & Technologies, University of Bologna, Via Tolara di Sopra 41/E, 40064 Ozzano dell'Emilia (Bologna), Italy <sup>5</sup> Finproject S.p.A., Plant Ascoli Piceno, Via Enrico Mattei, 1—Zona Ind.le Campolungo, 3100 Ascoli Piceno. <sup>6</sup> Department of Biological, Geological and Environmental Sciences, University of Bologna, via Selmi 3, 40126 Bologna, Italy. <sup>7</sup> Laboratorio de Estudios Cristalográficos, Instituto Andaluz de Ciencias de la Tierra (CSIC-UGR), Avda. Las Palmeras, no 4, 18100 Armilla (Granada), Spain.

**Figure S1.** Camera images of mussel shell showing periostracum in the black regions and nacre in the white regions (A) and after bleaching with NaClO 5% v/v solution (B).

p. S2

**Figure S2.** FTIR spectra of mussel shell (A), nacre (B), prismatic layer and

myostracum (C) and isolated prismatic layer (D). p. S2

**Figure S3.** Thermogravimetric analysis (TGA) profiles of bleached mussel

shell (A), nacre (B), prismatic layer and myostracum (C)

and isolated prismatic layer (D). p. S3

**Figure S4.** Optical microscopy images of isolated calcite fibers (A and B) and nacre

tablets (C and D). p. S3

**Figure S5.** High magnification SEM images of a single crystal of (A)

fibrous calcite and (B) tablet nacre. p. S4

**Table S1.** Size distribution of isolated prismatic layer (A) and nacre (B). p. S4

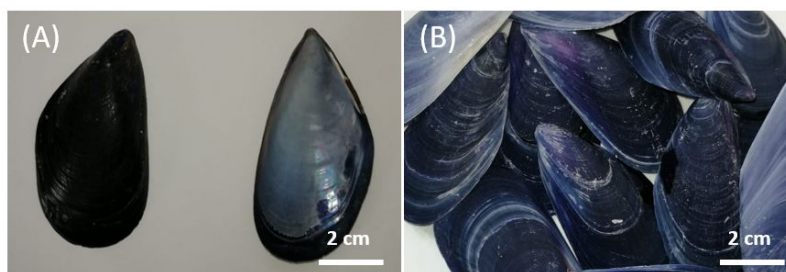

**Figure S1.** Camera images of mussel shell showing periostracum in the black regions and nacre in the white regions (A) and after bleaching with NaClO 5% v/v solution (B).

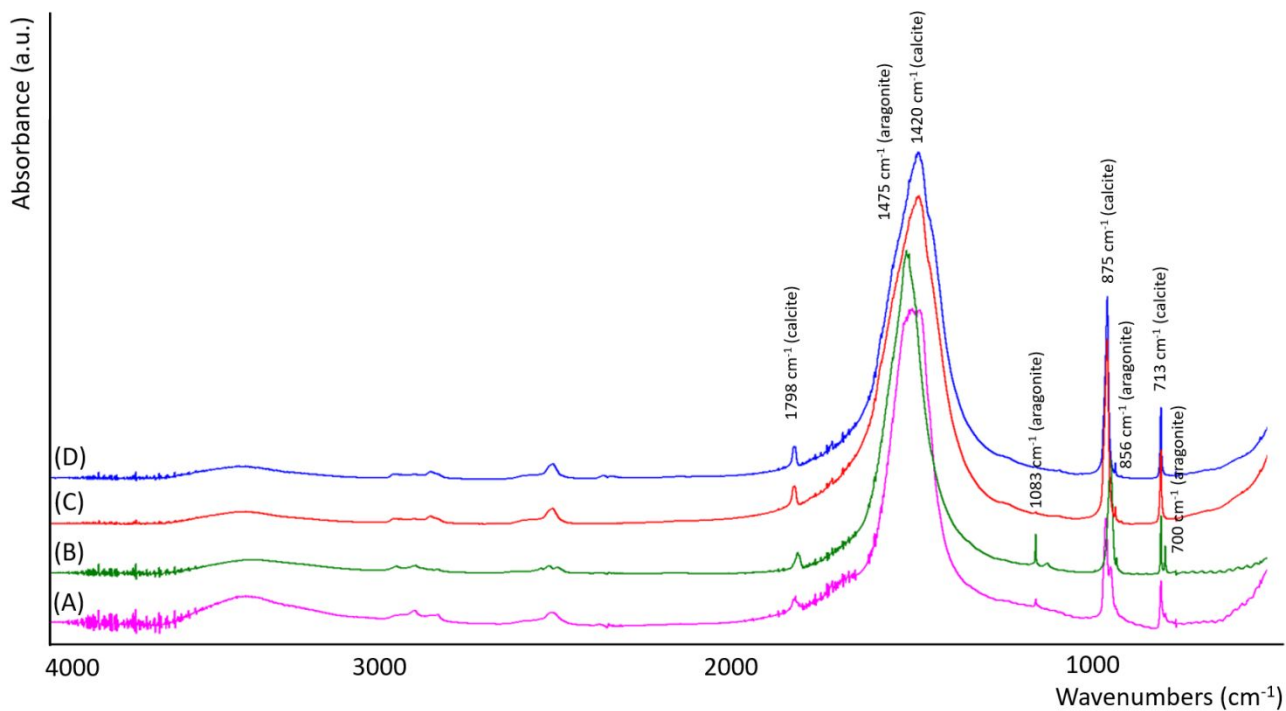

**Figure S2.** FTIR spectra of mussel shell (A), nacre (B), prismatic layer and myostracum (C) and isolated prismatic layer (D).

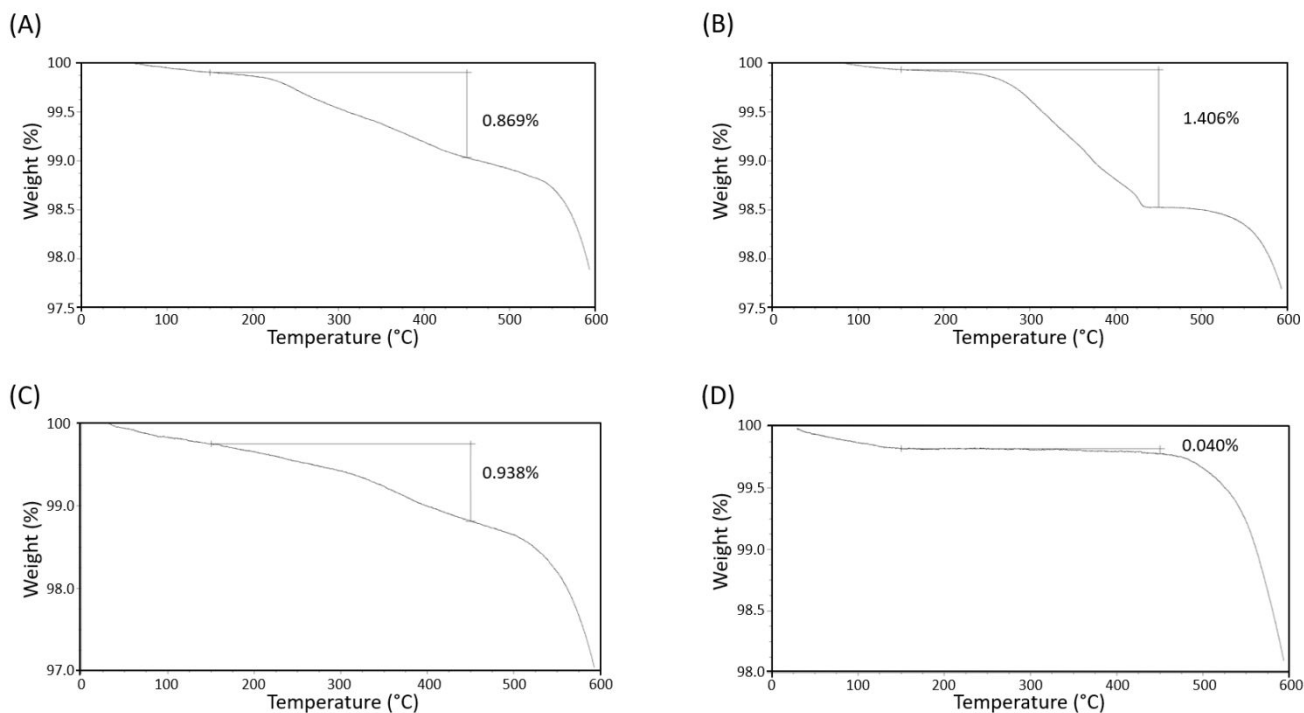

**Figure S3.** Thermogravimetric analysis (TGA) profiles of bleached mussel shell (A), nacre (B), prismatic layer and myostracum (C) and isolated prismatic layer (D). The temperature range considered to estimate the content of intraskeletal organic matrix was between 150°C and 450°C.

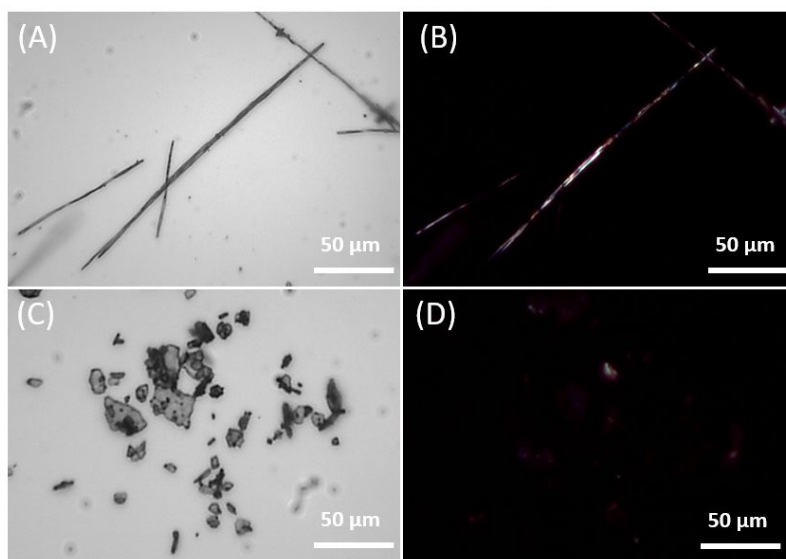

**Figure S4.** Optical microscopy images of isolated calcite fibers (A and B) and nacre tablets (C and D). B and D are images A and C, respectively, observed using polarized light.

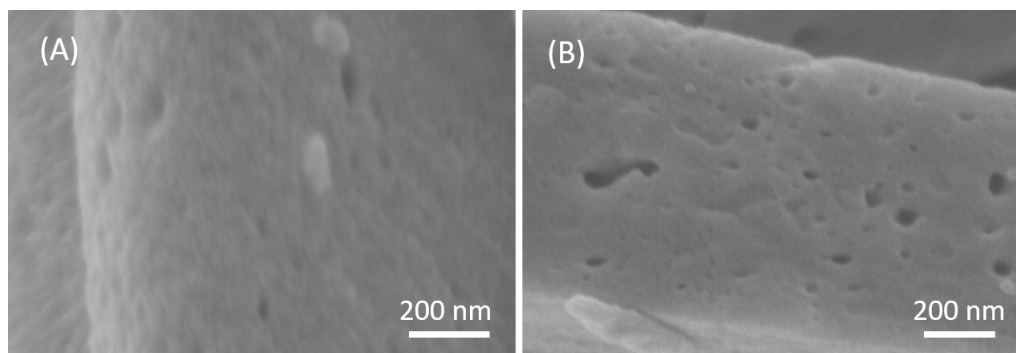

**Figure S5.** High magnification SEM images of the surface of single crystals of (A) fibrous calcite and (B) tablet nacre.

**Table S1.** Size distribution of isolated prismatic layer (A) and nacre (B).

| Sample | D <sub>10</sub> (μm) | D <sub>50</sub> (μm) | D <sub>90</sub> (μm) <sup>#</sup> |
|--------|----------------------|----------------------|-----------------------------------|
| A      | 1.202 ± 0.004        | 3.156 ± 0.009        | 9.402 ± 0.037                     |
| B      | 3.182 ± 0.008        | 7.212 ± 0.008        | 13.76 ± 0.05                      |

<sup>#</sup> D<sub>90</sub> indicates that 90% of particles have a diameter below the reported value.
